# Supplementary material for: Utility of the Consolidated Framework for Implementation Research for the patient perspective; comparison of the framework with a thematic analysis
Source: Research Square preprint supplement (doi:10.21203/rs.3.rs-7721475/v1), 2025-10-20
Supplement: Supplementary file 1 [file b488bccc590eb15694f636db.docx]

**Inclisiran**

**Feasibility and acceptability of delivery models for inclisiran**

Topic Guide (Patients)

**Preamble**

Reminder of the purpose of study

Explanation of interview consent and confidentiality of interview and analysis

Structure of the interview (may be some overlap in questions and responses)

Can stop the interview at any point if you do not wish to continue

Any questions you would like to ask before we start?

Recorder turned on

**Experience of high cholesterol and managing the condition**

**Can you tell me about your high cholesterol?**

How long have you had this condition?

How has it affected you in your day-to-day life?

**How was it managed/how did you manage it (before the trial)? (GP/secondary care/self care)**

Do you have any other health conditions?

**Do you take statins?**

Do you take any other medication for your high cholesterol?

**Can you tell me about your experience of taking statins?**

Have you ever refused or stopped taking a statin or medication? Why?

**Experience of the trial/Inclisiran injection**

**Tell me about how you became involved in the trial?**

*Treatment*

**When did you receive your injection?**

(Approximately)

**Can you tell me about going for the injection overall?**

**How were you invited?** (letter in the post/ phone call / attending the GP for another reason)

How do/did you get there?

How convenient was the time? How easy was it to make the appointment? To travel there?

**Who gave you the injection at the appointment?** (Doctor, nurse, pharmacist, home care team)

Why did you choose to attend the appointment for the injection?

**How important did you think it was for you to have the injection?**

Did you talk to anyone about your decision to have the injection beforehand?

What did they think?

**How do you feel about your treatment?**

Do you think your treatment will be good for you? / How optimistic are you that this treatment will be good for you? Why/why not?

**Would you recommend the injections to someone else? Why/why not?**

*Appointment*

**Could you describe your appointment?**

What was helpful about receiving treatment in this way? What was not helpful?

Who is the best person to provide these injections?

- Views about high cholesterol care/services

Who is best placed to support you with managing your high cholesterol?

**What did you think would happen at the appointment?**

Have you ever received treatment in this way before?

Do you know anyone else who has had it before?

Did you have any concerns?

Was it what you expected?

**Were you given a blood test and given the results (POC test?)? Did the nurse or doctor explain what the results mean?**

**How useful did you find the results/explanation?**

**How do you feel about managing your HC now you have this information? (same as before or changed?**

**Is there anything you would change about any aspects of the appointment and treatment you received?**

**Post interview debrief**

**Thank you for taking part**

**[Supplementary questions for those also receiving enhanced care]**

**As part of your treatment you were offered a telephone-based support service where a health advisor provides regular support advice to help people make positive behaviour changes.**

Did you decide to take up this offer? If not, what stopped you?

Experience of the calls

**When was your first call and how many have you had?**

**Who did you speak with on the first call?**

**Can you tell me about the call? (overall impression)**

Have you ever received support in this way before?

Did you have any concerns?

Was it what you expected?

**Were any behavioural changes suggested (exercise, stopping smoking etc)?**

How do you feel about that? (confident? Realistic?)

Did the health advisor suggest where and how you might do this?

What was helpful about receiving treatment in this way? What was not helpful?

Did the call provide enough information for your needs?

What was the main message you took away?

**How do you feel about managing your HC since you had the appointment? (same as before or changed?)**

How do you feel about the injection/taking statins now you have had the behavioural support/call?

**The telephone-based support service involves a 20-min monthly telephone call covering a range of advice tailored to meet your individual needs**

Have you decided to continue with the calls?

If not, why not?

Have you had any further calls?

Can you tell me about those?

**What are your views about frequency of calls?**

**What do you feel about the length of the calls?**

**Is there anything else that you would like to add?**

**Post interview debrief**

**Thank you for taking part**
